# Supplementary material for: The Tempered Polymerization of Human Neuroserpin
Source: PubMed Central journal article supplement (PMC3295756; doi:10.1371/journal.pone.0032444), 2012-03-06

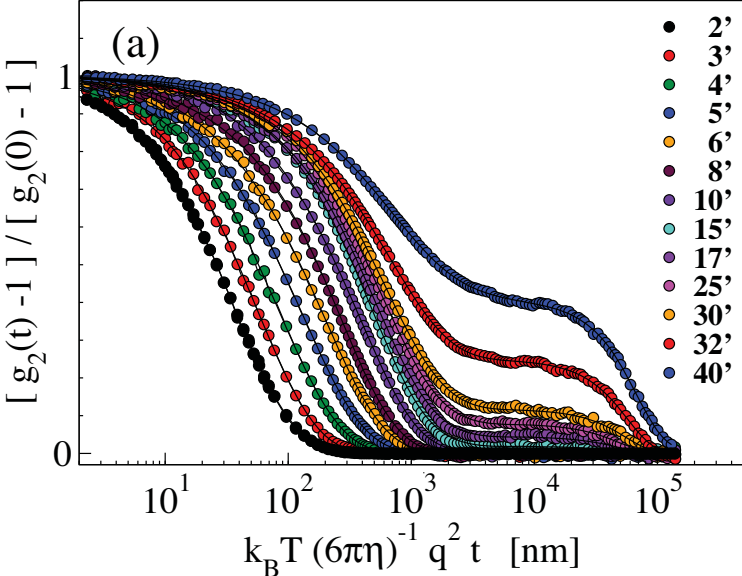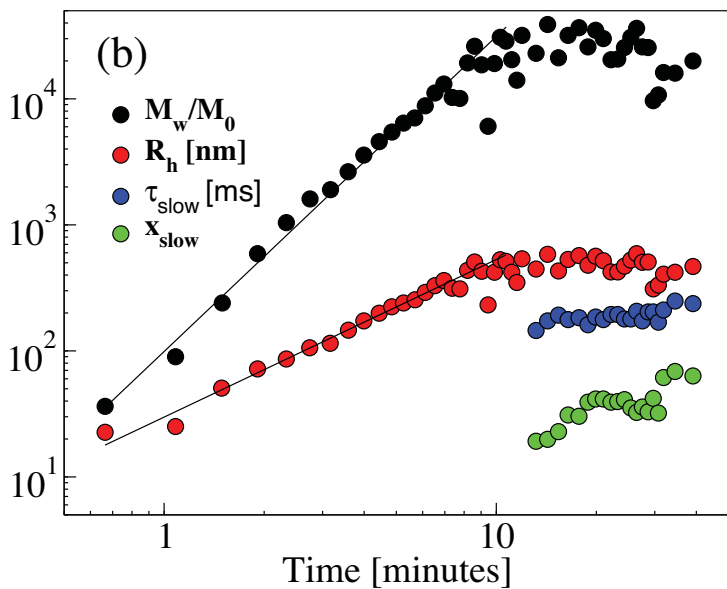

Supplement: pone.0032444.s002.pdf [file pone.0032444.s002.pdf]
