# Supplementary material for: The Tempered Polymerization of Human Neuroserpin
Source: PubMed Central journal article supplement (PMC3295756; doi:10.1371/journal.pone.0032444), 2012-03-06
Supplement: pone.0032444.s004.pdf [file pone.0032444.s004.pdf]

$$\begin{aligned}
\frac{d}{dt}[N] = & \underbrace{- (\kappa_{L^*}[N] - \kappa'_{L^*}[L])}_{\text{Latentization*}} \quad \underbrace{- (\kappa_A[N] - \kappa'_A[I])}_{\text{Activation}} \quad \underbrace{-\kappa_D a_{NI}[N][I]}_{\text{Dimerization}} \quad \underbrace{+\kappa_R(2b_{NN} + b_{NI})[2]}_{\text{Dimer dissociation}} \\
& \underbrace{-\kappa_M \sum_{p=2}^{\infty} a_{Np}[N][p]}_{\text{Monomer addition}} \quad \underbrace{+\kappa_R \sum_{p=2}^{\infty} b_{Np}[p+1]}_{\text{Monomer release}} \\
\frac{d}{dt}[I] = & \underbrace{- (\kappa_L[I] - \kappa'_L[L])}_{\text{Latentization}} \quad \underbrace{+ (\kappa_A[N] - \kappa'_A[I])}_{\text{Activation}} \quad \underbrace{-\kappa_D (a_{NI}[N] + 2a_{II}[I])[I]}_{\text{Dimerization}} \\
& \underbrace{-\kappa_M \sum_{p=2}^{\infty} a_{Ip}[I][p]}_{\text{Monomer addition}} \quad \underbrace{+\kappa_R \sum_{p=2}^{\infty} b_{Ip}[p+1]}_{\text{Monomer release}} \quad \underbrace{+\kappa_R(2b_{II} + b_{NI})[2]}_{\text{Dimer dissociation}} \\
\frac{d}{dt}[L] = & \underbrace{- (\kappa_L[I] - \kappa'_L[L])}_{\text{Latentization}} \quad \underbrace{- (\kappa_{L^*}[N] - \kappa'_{L^*}[L])}_{\text{Latentization*}} \\
\frac{d}{dt}[p] = & \underbrace{+\kappa_D (a_{NI}[N] + a_{II}[I])[I] \delta_{p2}}_{\text{Dimerization}} \quad \underbrace{+\kappa_R (b_{NI} + b_{NN} + b_{II})[2] \delta_{p2}}_{\text{Dimer dissociation}} \\
& \underbrace{+\kappa_M (a_{Np-1}[N] + a_{Ip-1}[I])[p-1] (1 - \delta_{p2}) - \kappa_M (a_{Np}[N] + a_{Ip}[I])[p]}_{\text{Monomer addition}} \\
& \underbrace{-\kappa_R (b_{Np-1} + b_{Ip-1})[p] (1 - \delta_{p2}) + \kappa_R (b_{Np} + b_{Ip})[p+1]}_{\text{Monomer release}} \\
& \underbrace{+\kappa_P \frac{1}{2} \sum_{j=2}^{p-2} a_{j,p-j}[j][p+j] - \kappa_P \sum_{j=2}^{\infty} a_{jp}[j][p]}_{\text{Polymer - Polymer Association}} \quad \underbrace{-\kappa_F \frac{1}{2} \sum_{j=2}^{p-2} a_{j,p-j}[p] + \kappa_F \sum_{j=2}^{\infty} a_{jp}[p+j]}_{\text{Fragmentation}}
\end{aligned}$$


---

$$\frac{d}{dt}M_w = \frac{M_1^2}{c} \sum_{ij=1}^{\infty} ij \{ a_{ij}c\kappa_P[i][j] - b_{ij}\kappa_F[i+j] \} = 1 + a_{NI}c\kappa_A\kappa_D t^2 + O(t^3)$$
