# Supplementary material for: The Tempered Polymerization of Human Neuroserpin
Source: PLOS journal article supplement (doi:10.1371/journal.pone.0032444), 2012-03-06
Supplement: S3 (10.1371/journal.pone.0032444.s003) [file journal.pone.0032444.s003]

|                                                           |                                 |
|-----------------------------------------------------------|---------------------------------|
| Monomeric and polymeric species                           | Number concentrations           |
| native functional neuroserpin                             | $[N]$                           |
| latent inactive neuroserpin                               | $[L]$                           |
| intermediate conformer, active for aggregation            | $[I]$                           |
| polymer made of $p$ monomers                              | $[P]$ (1)                       |
| First order processes:                                    | Rates                           |
| molecular interconversions among monomeric states         |                                 |
| activation of native monomers                             | $\kappa_A [N]$                  |
| latentization from native monomers                        | $\kappa_L [N]$ (2)              |
| latentization from intermediates                          | $\kappa_L^* [I]$                |
| inactivation of intermediates                             | $\kappa'_A [I]$                 |
| latent loss to native monomers                            | $\kappa'_L [L]$ (3)             |
| latent loss to intermediates                              | $\kappa'_L [L]$ (3)             |
| Second order processes: polymer formation                 | Rates (4)                       |
| dimerization from a native and an intermediate monomer    | $a_{NI} \kappa_D c [N] [I]$ (5) |
| dimerization from two intermediate monomers               | $a_{II} \kappa_D c [I] [I]$ (5) |
| native monomer addition to polymers of $p$ monomers       | $a_{Np} \kappa_M c [N] [p]$ (6) |
| intermediate monomer addition to polymers of $p$ monomers | $a_{Ip} \kappa_M c [I] [p]$ (6) |
| association of two polymers of $i$ and $j$ monomers       | $a_{ij} \kappa_P c [i] [j]$     |
| Other first order processes: depolymerization             | Rates                           |
| native monomer release from polymers of $p$ units         | $b_{Np} \kappa_R [p]$ (7)       |
| intermediate monomer release from polymers of $p$ units   | $b_{Ip} \kappa_R [p]$ (7)       |
| fragmentation in two polymers of $i$ and $j$ units        | $b_{ij} \kappa_F [i + j]$       |

(1) The total monomer number concentration is  $[1] = [N] + [L] + [I]$

(2) This process has been ruled out by Chiou et al. 2009, Biophys. J. 97,2306.

(3) Latent loss can be reasonably neglected since latent conformation is in a deep free energy minimum. (4)  $c$  is the total mass concentration.

(5) Short notation for dimerization rates:  $a_{11} = (a_{NI} [N] + a_{II} [I]) [I] [1]^{-2} \kappa_D \kappa_P^{-1}$ .

(6) Short notation for monomer addition rates:  $a_{1p} = (a_{Np} [N] + a_{Ip} [I]) [1]^{-1} \kappa_M \kappa_P^{-1}$ .

(7) Short notation for monomer release rates:  $b_{1p} = (b_{Np} + b_{Ip}) \kappa_R \kappa_F^{-1}$ ;

and for  $p = 1$ :  $b_{1p} = (b_{NN} + b_{NI} + b_{II}) \kappa_R \kappa_F^{-1}$ .
